# Supplementary material for: Effects of Music-Based Interventions on Motor and Non-Motor Symptoms in Patients with Parkinson’s Disease: A Systematic Review and Meta-Analysis
Source: MDPI journal article supplement (doi:10.3390/ijerph20021046), 2023-01-06
Supplement: s1 [file s1]

### 3.4.1 Cadence

| Sensitivity Analysis         | Heterogeneity              | Effect size: MD[ 95% CI]        |
|------------------------------|----------------------------|---------------------------------|
| Bukowska 2016 excluded       | $I^2 = 84\%$ , $P = 0.002$ | 3.13 [-8.00, 14.26], $P = 0.58$ |
| Calabrò 2019 excluded        | $I^2 = 32\%$ , $P = 0.23$  | 6.50 [1.37, 11.62], $P = 0.01$  |
| Chaiwanichsiri 2011 excluded | $I^2 = 84\%$ , $P = 0.002$ | 2.93 [-6.50, 12.35], $P = 0.54$ |
| Thaut 1996 excluded          | $I^2 = 62\%$ , $P = 0.07$  | 0.33 [-6.51, 7.17], $P = 0.92$  |

### 3.5.1 Cognitive flexibility

| Sensitivity Analysis | Heterogeneity             | Effect size: MD[ 95% CI]          |
|----------------------|---------------------------|-----------------------------------|
| Bugos 2021 excluded  | $I^2 = 55\%$ , $P = 0.14$ | 13.63 [-26.91, 54.17], $P = 0.51$ |
| Park 2021 excluded   | $I^2 = 0\%$ , $P = 0.81$  | 39.43 [10.11, 68.75], $P = 0.008$ |
| Spina 2016 excluded  | $I^2 = 75\%$ , $P = 0.04$ | 15.33 [-20.38, 51.03], $P = 0.40$ |

### 3.5.3 Quality of life

| Sensitivity Analysis    | Heterogeneity                | Effect size: SMD[ 95% CI]       |
|-------------------------|------------------------------|---------------------------------|
| Bugos 2021 excluded     | $I^2 = 91\%$ , $P < 0.00001$ | -0.78 [-2.12, 0.56], $P = 0.25$ |
| Fodor 2021 excluded     | $I^2 = 90\%$ , $P < 0.00001$ | -0.90 [-2.18, 0.38], $P = 0.17$ |
| Pacchetti 2000 excluded | $I^2 = 0\%$ , $P = 0.64$     | -0.09 [-0.45, 0.27], $P = 0.64$ |
| Shah 2020 excluded      | $I^2 = 91\%$ , $P < 0.00001$ | -0.82 [-2.14, 0.49], $P = 0.22$ |
| Spina 2016 excluded     | $I^2 = 90\%$ , $P < 0.00001$ | -0.92 [-2.15, 0.31], $P = 0.14$ |
